# Supplementary material
Source: Royal Society of Chemistry journal article supplement (doi:10.1039/d6fo00600k)
Supplement: d6fo00600k1.pdf [file d6fo00600k1.pdf]

**Pumpkin (*Cucurbita maxima*) seed extract ameliorates letrozole and high - fat diet - induced PCOS in rats via SIRT1/AMPK/NF -  $\kappa$ B signaling.**

Suhasini Sidrameshwar<sup>1,2</sup> and Asha Martin<sup>1,2\*</sup>

<sup>1</sup> Department of Biochemistry, CSIR Central Food Technological Research Institute, Mysuru-570 020, India.

<sup>2</sup> Academy of Scientific and Innovative Research (AcSIR), Ghaziabad-201002, India.

\*Corresponding author Email: [ashamartin@cftri.res.in](mailto:ashamartin@cftri.res.in)

**SUPPLEMENTARY DATA**

**Method validation for quantitative analysis of polyphenolic compounds by RP-HPLC.**

The quantification of phenolic compounds was achieved from three determinations using external calibration curves constructed with five different concentrations of the corresponding standard. Limits of detection (LODs) and limits of quantification (LOQ) were calculated from the residual standard deviation ( $\sigma$ ) of the regression curve and the slope (S), according to the following equations:  $LOD=3.3\sigma/S$  and  $LOQ=10\sigma/S$  (Table S1).

**Table S1. Regression equations, LOD, and LOQ for the quantification of phenolic compounds.**

| Compound        | Content (mg/g of PSE) | Regression equation | R <sup>2</sup> | Range of conc. tested ( $\mu$ g/mL) | LOD ( $\mu$ g/mL) | LOQ ( $\mu$ g/mL) | Intra-day RSD (%) | Inter-day RSD (%) |
|-----------------|-----------------------|---------------------|----------------|-------------------------------------|-------------------|-------------------|-------------------|-------------------|
| Gallic acid     | 18.442 $\pm$ 1.054    | y=185368x-3200.5    | 0.9930         | 0.4-2.0                             | 0.232             | 0.703             | 3.43              | 2.7               |
| Catechin        | 10.422 $\pm$ 0.286    | y=6642.9x+176.24    | 0.9908         | 0.4-2.0                             | 0.266             | 0.805             | 2.44              | 1.74              |
| Caffeic acid    | 5.746 $\pm$ 0.169     | y=39845x-275.05     | 0.9936         | 0.4-2.0                             | 0.221             | 0.670             | 3.65              | 1.11              |
| p-coumaric acid | 2.368 $\pm$ 0.001     | y=3E+06x-139046     | 0.9965         | 0.4-2.0                             | 0.047             | 0.142             | 4.12              | 1.49              |
| Sinapic acid    | 27.141 $\pm$ 0.971    | y=133093x+961.52    | 0.9912         | 0.4-2.0                             | 0.260             | 0.789             | 3.63              | 1.38              |
| Quercetin       | 24.768 $\pm$ 0.015    | y=4E+06x142513      | 0.9918         | 0.4-2.0                             | 0.251             | 0.759             | 0.24              | 2.52              |
| Naringenin      | 8.367 $\pm$ 0.164     | y=3E+06x-30602      | 0.9915         | 0.4-2.0                             | 0.255             | 0.773             | 0.99              | 1.74              |

**Table S2. Composition of control and high-fat-diet (HFD).**

| Sl. No. | Ingredients             | Control Diet (%) | High fat diet (%) |
|---------|-------------------------|------------------|-------------------|
| 1       | Casein                  | 20.0             | 20.0              |
| 2       | Cystine                 | 0.3              | 0.3               |
| 3       | Corn starch             | 45.22            | 7.28              |
| 4       | Sucrose                 | 17.68            | 17.68             |
| 5       | Lodex 10 (Carbohydrate) | 7.5              | 10.0              |
| 6       | SolkaFloc (Fiber)       | 5.0              | 5.0               |
| 7       | Tallow                  | 2.0              | 17.75             |
| 8       | Soybean oil             | 2.5              | 2.5               |
| 9       | Mineral mix             | 5.0              | 5.0               |
| 10      | Choline bitartrate      | 0.2              | 0.2               |
| 11      | AIN-76A vitamin mix     | 0.1              | 0.1               |

**Table S3. Sequences of primers used for Real-Time PCR**

| Gene            |   | Primer Sequence 5'-3'      |
|-----------------|---|----------------------------|
| GAPDH           | F | GGTGGTCTCCTCTGACTTCAACA    |
|                 | R | GTTGCTGTAGCCAAATTCGTTGT    |
| SIRT1           | F | TGCTGGCCTAATAGAGTGGCA      |
|                 | R | CTCAGCGCCATGGAAAATGT       |
| p-AMPK $\alpha$ | F | TAAACCCACAGAAATCCAAACACC   |
|                 | R | ACAACCTTCCATTCATAGTCCAACCT |
| PGC-1 $\alpha$  | F | TGAAGACGGATTGCCCTCATT      |
|                 | R | GCTGGTGCCAGTAAGAGCTT       |
| FOXO1           | F | TCTAAAACCTGCAAGCAGACC      |
|                 | R | CCCCTAGCACTACTTACATT       |
| SREBP-1c        | F | TCAGCGAGGCGGCTTTGGAGCAG    |
|                 | R | CATGTCTTCGATGTCGGTCAG      |
| PPAR- $\gamma$  | F | CTCCAATGTTCTCAAACCTTAC     |
|                 | R | GATGAGTCATGTAAGTTGACC      |
| LXR- $\beta$    | F | AAGCCCTGCATGCCTACGT        |
|                 | R | TGCAGACGCAGTGCAAACA        |
| NF- $\kappa$ B  | F | GAAATTCCTGATCCAGACAAAAAC   |
|                 | R | ATCACTTCAATGGCCTCTGTAG     |

GAPDH: Glyceraldehyde-3-Phosphate Dehydrogenase, F: Forward, R: Reverse

**Table S4. Effect of low and high doses of PSE on rat organ weight.**

| Organ            | Control                    | PCOS                     | PCOS+Met                | PCOS+PSEL              | PCOS+PSEH                |
|------------------|----------------------------|--------------------------|-------------------------|------------------------|--------------------------|
| Left ovary (mg)  | 64.66±1.52 <sup>b***</sup> | 146.66±2.08 <sup>a</sup> | 67±2.64 <sup>b</sup>    | 64±1.0 <sup>b</sup>    | 65±1.0 <sup>b</sup>      |
| Right ovary (mg) | 61±1.0 <sup>c***</sup>     | 148.33±1.15 <sup>a</sup> | 69.33±0.57 <sup>b</sup> | 63±1.0 <sup>c</sup>    | 63.66±1.15 <sup>bc</sup> |
| Liver (g)        | 6.34±4.05 <sup>d***</sup>  | 8.88±2.08 <sup>a</sup>   | 7.33±3.05 <sup>b</sup>  | 7.33±1.73 <sup>b</sup> | 6.68±0.57 <sup>c</sup>   |
| Uterus (g)       | 5.94±2.08 <sup>a***</sup>  | 3.25±3.51 <sup>e</sup>   | 3.75±2.08 <sup>d</sup>  | 4.52±2.51 <sup>b</sup> | 4.05±4.72 <sup>c</sup>   |

Data are expressed as mean ± SD (n=6 animals in each group). Different letters (a-e) indicate significant differences among groups according to Tukey's post hoc test ( $p < 0.05$ ). For all variables with the same letter, the difference between the means is not statistically significant. \*\*\* indicates significant difference between control and all the groups ( $P < 0.001$ ).

**Table S5. Effect of low and high doses of PSE on rat ovary follicular count.**

|                    | Control                  | PCOS                   | PCOS+Met               | PCOS+PSEL               | PCOS+PSEH               |
|--------------------|--------------------------|------------------------|------------------------|-------------------------|-------------------------|
| Primary follicle   | 6.5±1.17 <sup>ab*</sup>  | 9.33±0.47 <sup>a</sup> | 4.66±1.41 <sup>b</sup> | 3.5±1.17 <sup>b</sup>   | 6.83±0.23 <sup>ab</sup> |
| Secondary follicle | 4.16±0.70 <sup>ans</sup> | 4±0.94 <sup>a</sup>    | 4.66±1.41 <sup>a</sup> | 4.83±0.70 <sup>a</sup>  | 6.66±2.35 <sup>a</sup>  |
| Tertiary follicle  | 4.16±2.12 <sup>ans</sup> | 3.33±0.47 <sup>a</sup> | 8.66±0.94 <sup>a</sup> | 10.00±3.77 <sup>a</sup> | 8.00±0.94 <sup>a</sup>  |
| Cystic follicle    | 0.0±0.0 <sup>b***</sup>  | 9.5±0.70 <sup>a</sup>  | 0.0±0.0 <sup>b</sup>   | 0.0±0.0 <sup>b</sup>    | 0.0±0.0 <sup>b</sup>    |

Data are expressed as mean ± SD (n=6 animals in each group). Different letters (a-e) indicate significant differences among groups according to Tukey's post hoc test ( $p < 0.05$ ). For all variables with the same letter, the difference between the means is not statistically significant. \* indicates significant difference between control and all the groups ( $*P < 0.05$ ,  $*** P < 0.001$ , ns- Not significant).

|                                                         | Gallic acid | Catechin   | Caffeic acid | p-coumaric acid | Sinapic acid | Quercetin   | Naringenin | Total                   |
|---------------------------------------------------------|-------------|------------|--------------|-----------------|--------------|-------------|------------|-------------------------|
| <b>Quantified compound (mg/g of PSE)</b>                | 18.44±1.05  | 10.42±0.28 | 5.74±0.16    | 2.36±0.001      | 27.14±0.97   | 24.76±0.015 | 8.36±0.16  | 97.25±2.66 mg/g extract |
| <b>Translated dose at 100 mg/kg of BW (PCOS + PSEL)</b> | 1.84±0.10   | 1.04±0.02  | 0.57±0.01    | 0.23±0.001      | 2.71±0.09    | 2.47±0.001  | 0.83±0.01  | 9.72±0.26 mg/kg of BW   |
| <b>Translated dose at 200 mg/kg of BW (PCOS+ PSEH)</b>  | 3.68±0.21   | 2.08±0.05  | 1.14±0.03    | 0.47±0.003      | 5.42±0.19    | 4.95±0.003  | 1.67±0.03  | 19.45±0.53 mg/kg of BW  |

**Table S6.** Translation of RP-HPLC quantified polyphenols in PSE to *in vivo* doses.

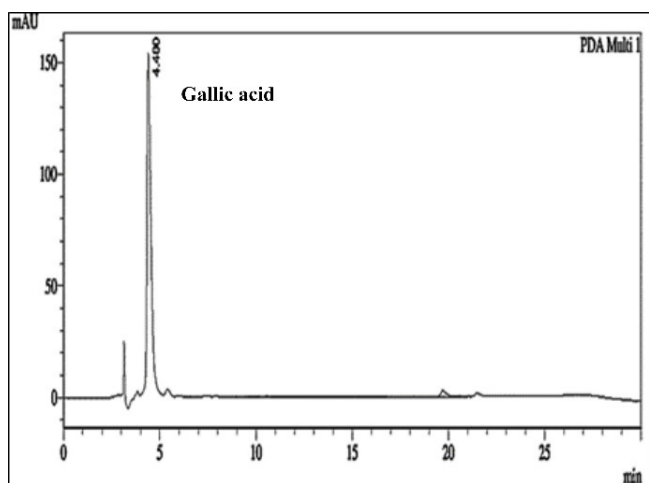

A.

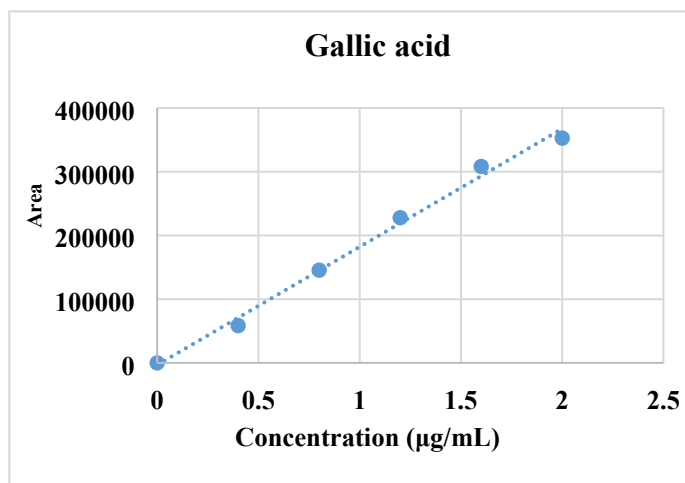

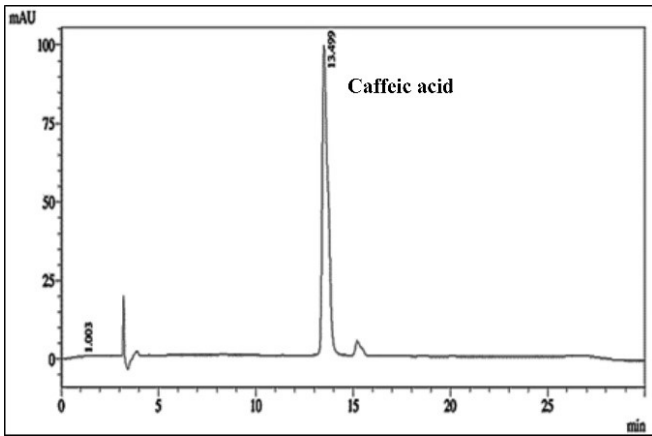

B.

C.

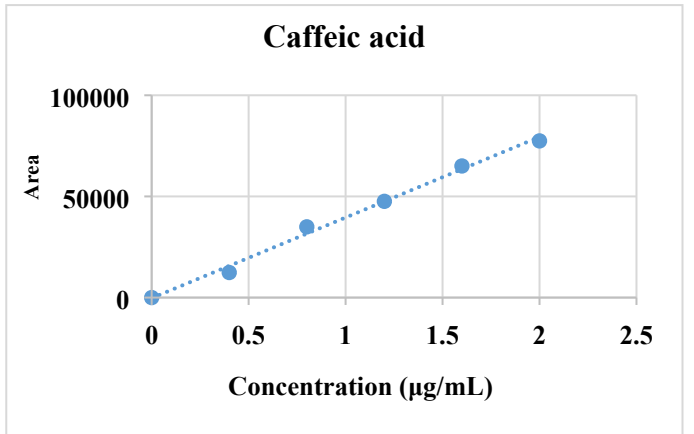

D.

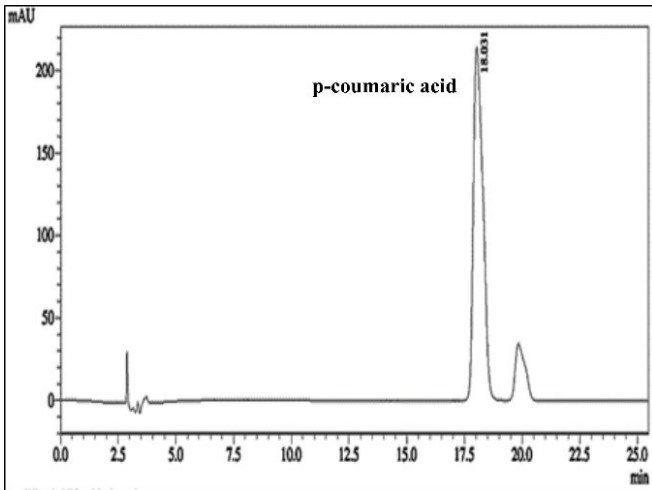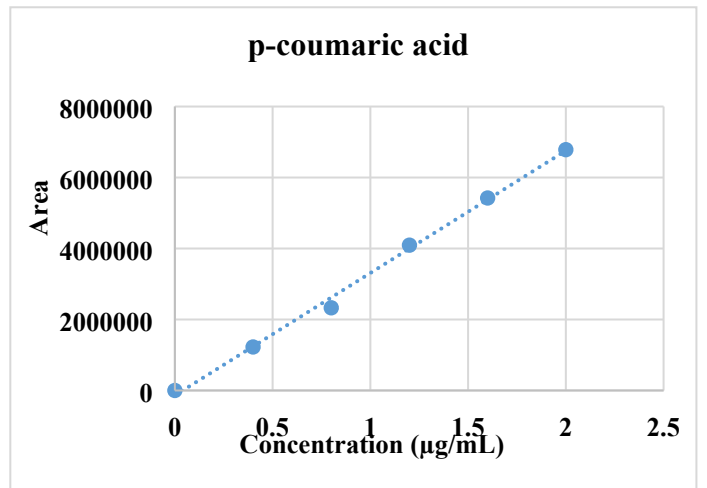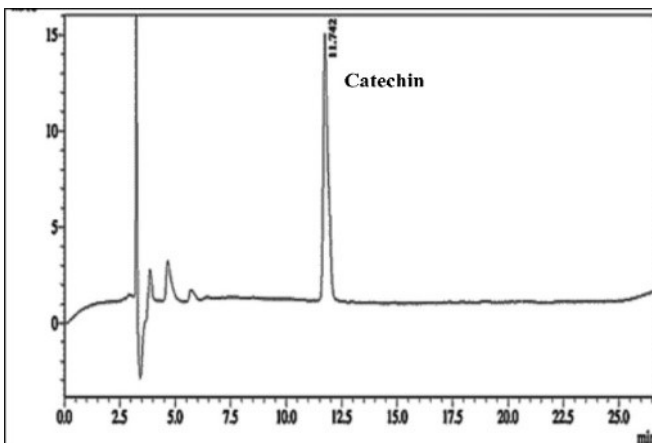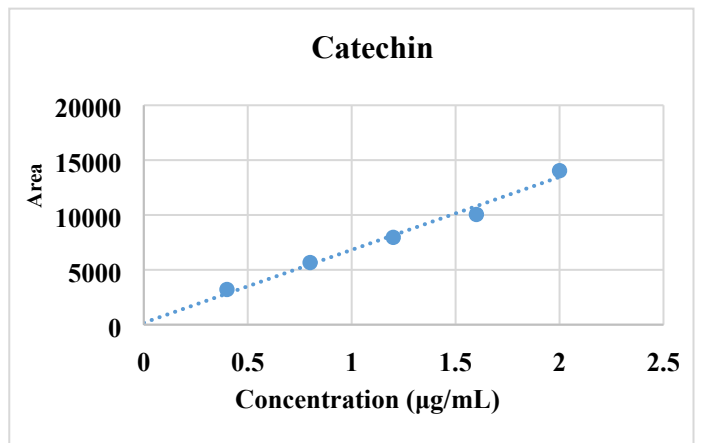

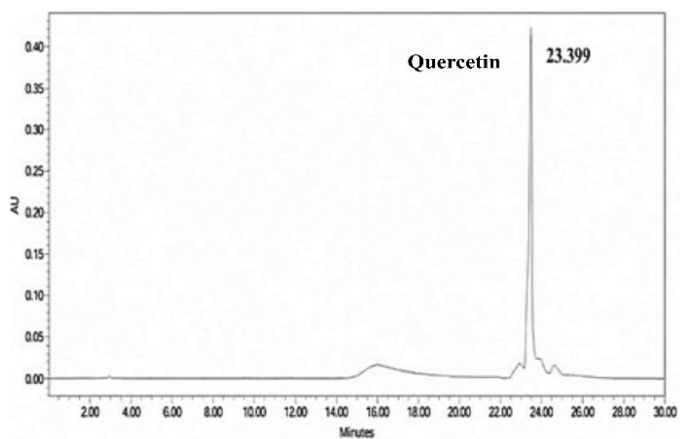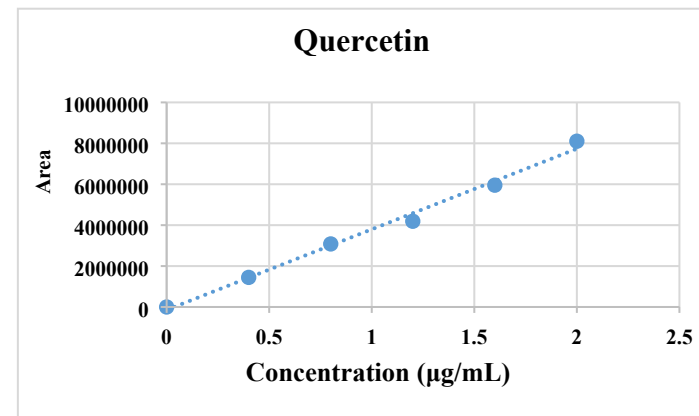

E.

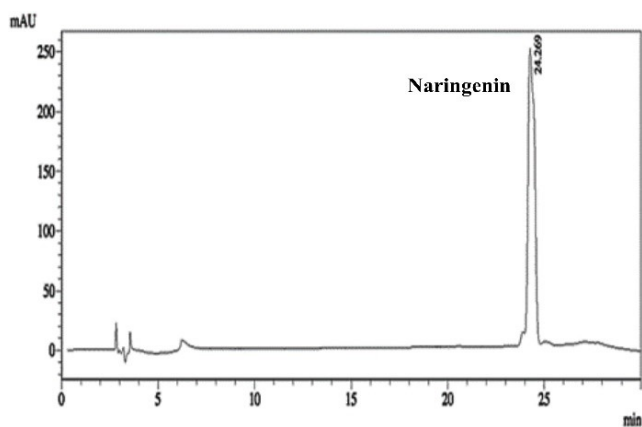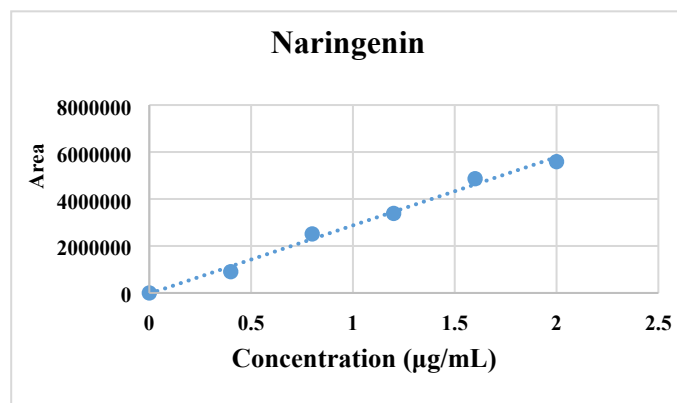

F.

G.

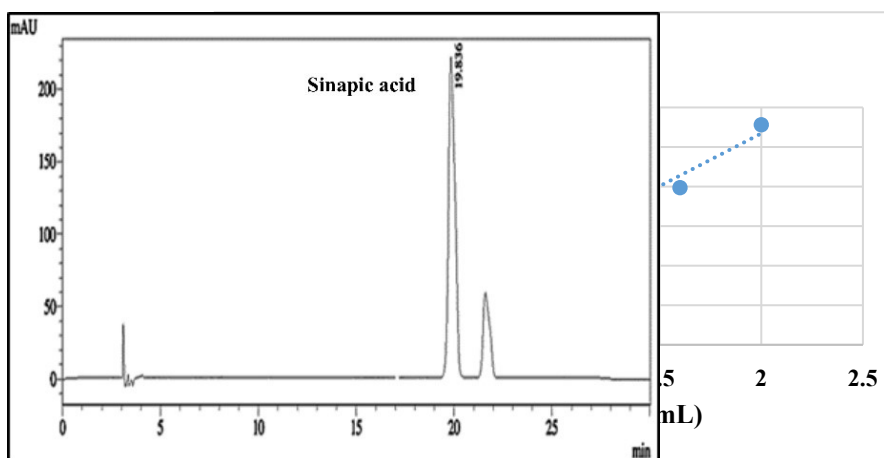

**Figure S1.** Representative HPLC Chromatograms (left side) and calibration curves (right side) of standard compounds. A. - Gallic acid, B. - Catechin, C. - Caffeic acid, D - p-coumaric acid, E - Sinapic acid, F - Quercetin and G - Naringenin.

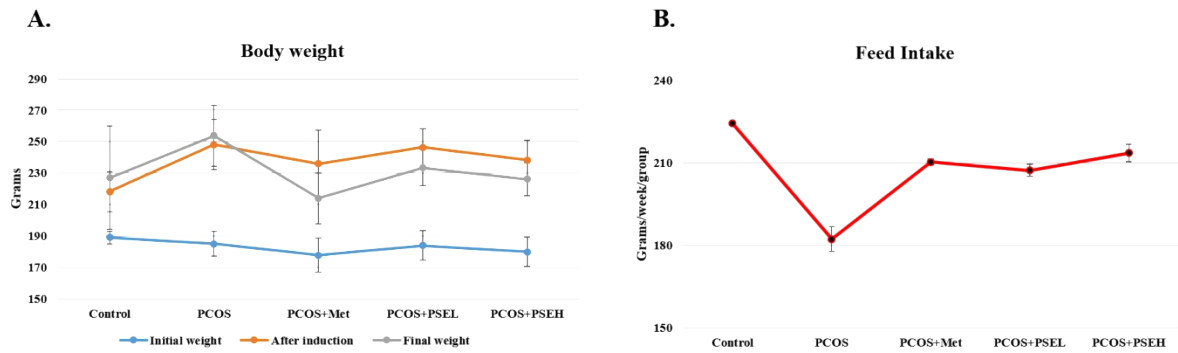

**Figure S2.** Effect of low and high doses of PSE on A. Animals body weight. B. Feed Intake. Data are expressed as mean  $\pm$  SD (n=6 animals in each group).

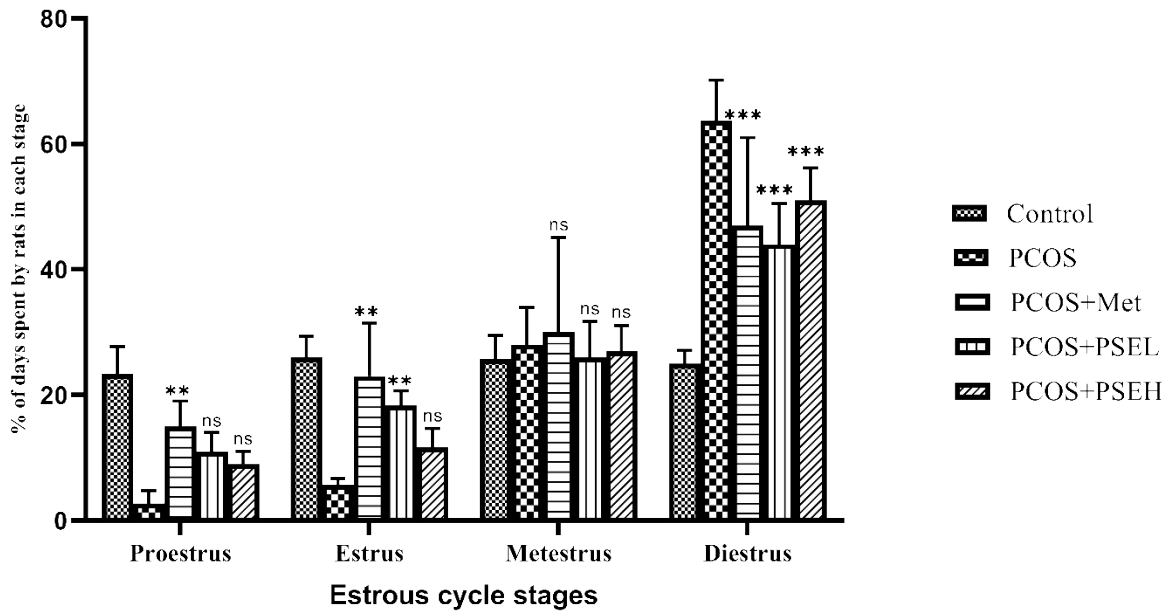

**Figure S3.** Percentage of days spent by the rats in each stage of the estrous cycle monitored during treatment with metformin, pumpkin seed extract, low dose and high dose (n=6 animals in each group). Different letters (a-e) indicate significant differences among groups according to Tukey's post hoc test ( $p < 0.05$ ). For all variables with the same letter, the difference between the means is not statistically significant.); \* indicates significant difference between control and all the groups (\*\* $P < 0.01$ , \*\*\*  $P < 0.001$ , ns- Not significant).

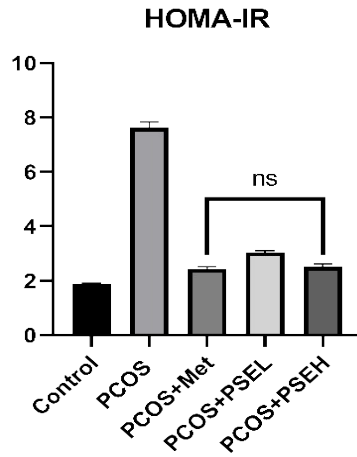

**Figure S4.** Effect of PSE treatment on HOMA-IR of each group. Values are expressed as mean  $\pm$  SD (n=6 animals in each group). ns indicates the significant difference between PCOS+Met and PCOS+PSEH ( $p > 0.05$ )

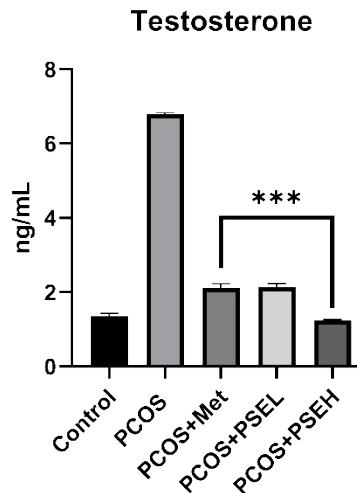

**Figure S5.** Effect of PSE treatment on testosterone hormone of each group. Values are expressed as mean  $\pm$  SD (n=6 animals in each group). Different letters (a-e) indicate significant differences among groups according to Tukey's post hoc test ( $p < 0.05$ ). For all variables with the same letter, the difference between the means is not statistically significant.). \*\*\* indicates the significant difference between the PCOS+Met group and PCOS+PSEH ( $p < 0.001$ )

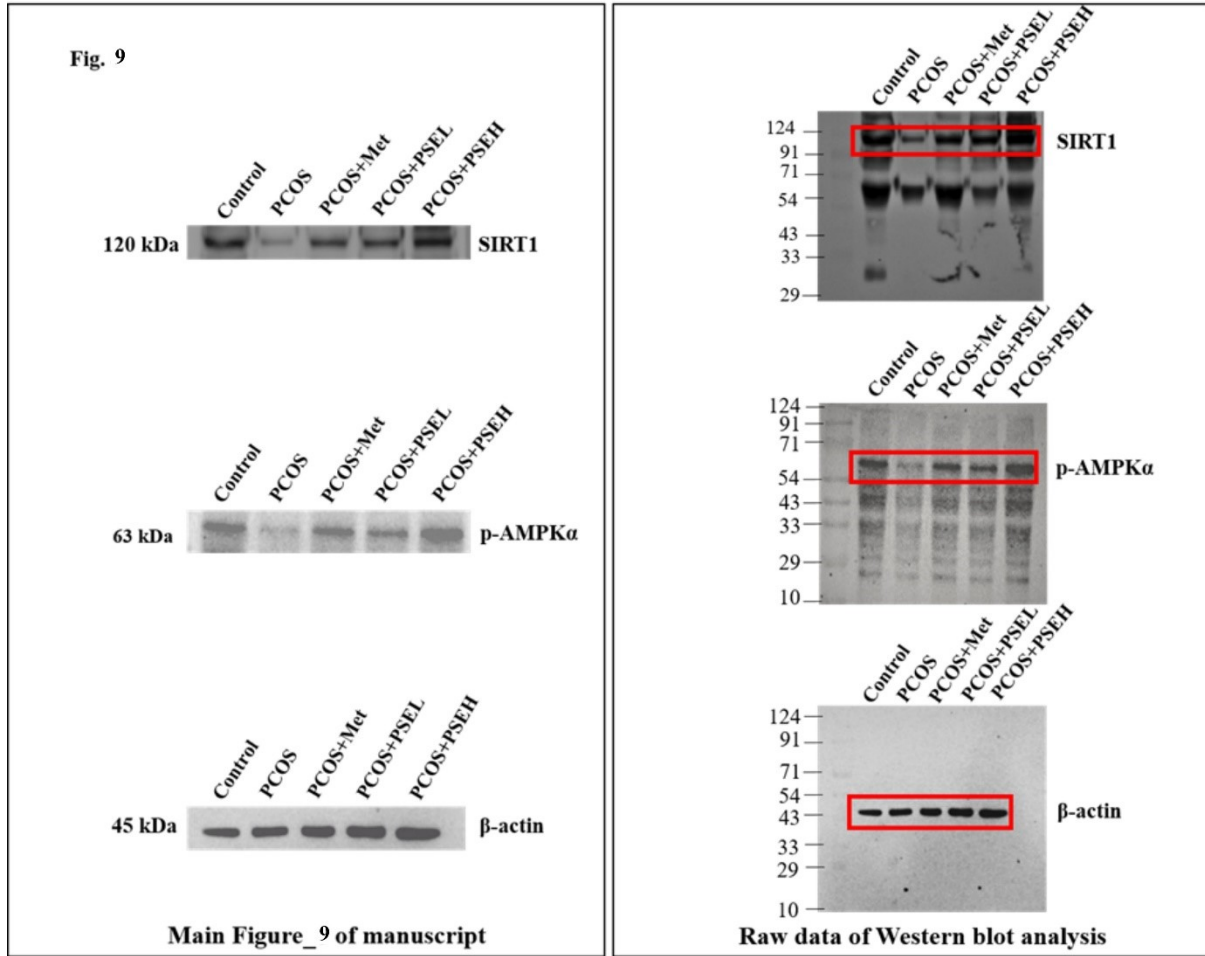

**Figure S6.** Full images of Western blot analysis
